# Supplementary material for: Copper(ii) phthalocyanine supported on a three-dimensional nitrogen-doped graphene/PEDOT-PSS nanocomposite as a highly selective and sensitive sensor for ammonia detection at room temperature
Source: Royal Society of Chemistry journal article supplement (doi:10.1039/c5ra13976g), 2015-01-01
Supplement: c5ra13976g1.pdf [file c5ra13976g1.pdf]

## Supporting Information

### **Copper (II) phthalocyanine supported on three-dimensional nitrogen-doped graphene/PEDOT-PSS nanocomposite as highly selective and sensitive sensor for ammonia detection at room temperature**

Hamed Sharifi Dehsari<sup>†a</sup>, Jaber Nasrollah Gavvani<sup>†a</sup>, Amirhossein Hasani<sup>c</sup>, Mojtaba Mahyari<sup>\*b</sup>,  
Elham Khodabakhshi Shalamzari<sup>a</sup>, Alireza Salehi<sup>c</sup>, Farmarz Afshar Taromi<sup>1a</sup>

- a) Department of Polymer Engineering and Color Technology, Amirkabir University of Technology, P.O.Box 15875-4413, Tehran, Iran
- b) Department of Chemistry, Shahid Beheshti University, G. C., P.O.Box 19396-4716, Tehran, Iran
- c) Department of Electrical Engineering, K.N. Toosi University of Technology, P.O.Box 16315- 1355, Tehran, Iran

---

<sup>†</sup>Email address: afshar@aut.ac.ir; m\_mahyari@sbu.ac.ir  
Tel: +982164542401

<sup>†</sup>First two authors contributed equally to this work.

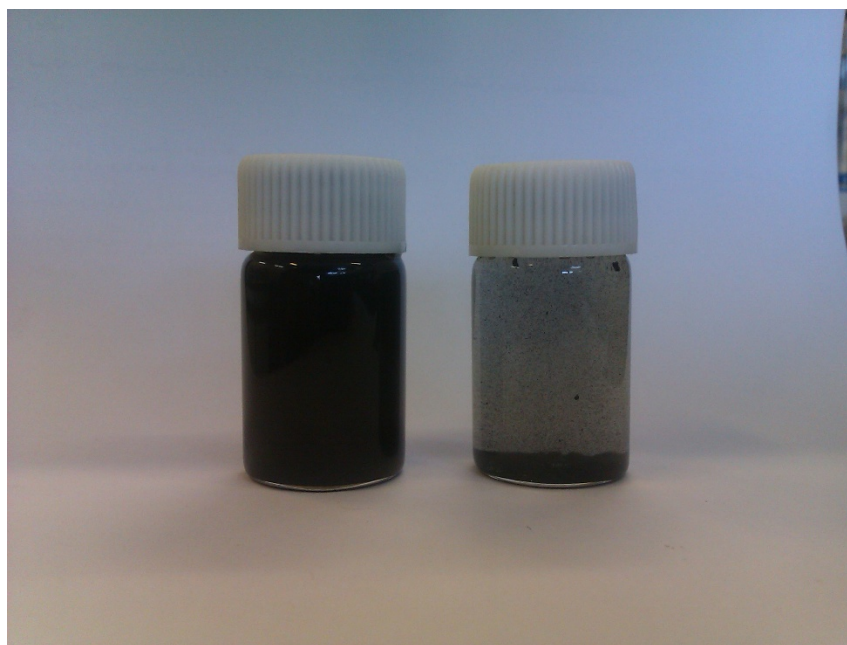

Fig. S1 Dispersity of 3D-(N)GFs and CuTSPc@3D-(N)GFs

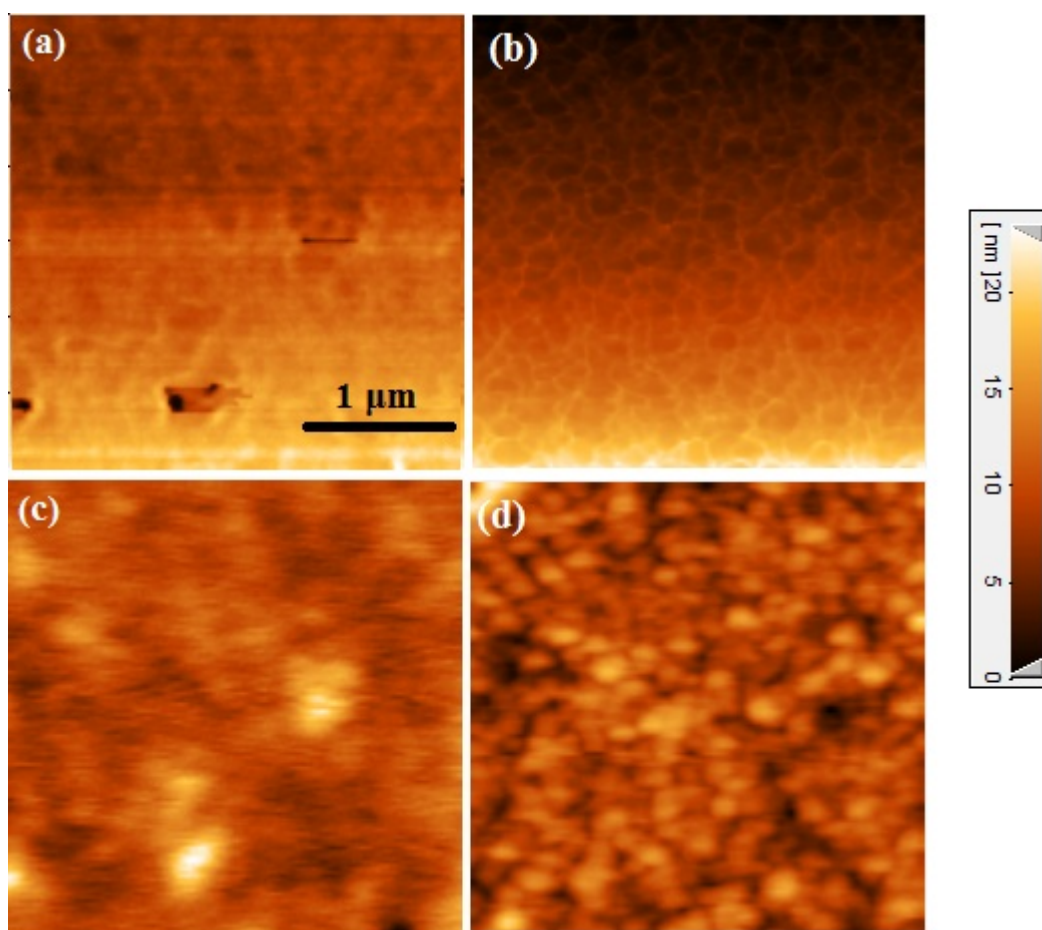

Fig. S2 AFM topographical images of (a) pure PEDOT-PSS, (b) CuTSPc@3D-(N)GFs/PEDOT-PSS and phase images of (c) pure PEDOT-PSS and (d) CuTSPc@3D-(N)GFs/PEDOT-PSS nanocomposite sensing films.

Surface morphologies and phase images of pure PEDOT-PSS and CuTSPc@3D-(N)GFs/PEDOT-PSS nanocomposite sensing films were shown in Fig. S2. From AFM images, it can be seen that pristine PEDOT-PSS film surface is very smooth corresponding to its SEM image (see Fig. S2a). With CuTSPc@3D-(N)GFs incorporation, the film surface becomes relatively rough covering with a number of nanoprotusions (see Fig. S2b). From the AFM phase image (see Fig. S2c), the PEDOT-PSS sensing film shows relatively low contrast in the phase. The bright and dark areas in the phase image are expected to correspond to PEDOT-rich grains and PSS-rich matrix, respectively. It is seen that the grain and matrix mixture is homogeneous indicating that PEDOT-rich grains exhibit very good connection with PSS-rich matrix via DMSO binders resulting in the enhancement of carriers conducting pathways [1, 2]. In case of CuTSPc@3D-(N)GFs/PEDOT-PSS (see Fig. S2d), the strong contrast in the phase can distinguish the relatively hard structures (CuTSPc@3D-(N)GFs) from the softer component (PEDOT-PSS). However, the CuTSPc@3D-(N)GF structures in and on PEDOT-PSS network cannot be very clearly distinguished due to overcoating of PEDOT-PSS on CuTSPc@3D-(N)GFs surfaces and limited resolution in AFM.

## References

1. Seekaew, Y., et al., *Low-cost and flexible printed graphene–PEDOT: PSS gas sensor for ammonia detection*. Organic Electronics, 2014. **15**(11): p. 2971-2981.
2. Dehsari, H.S., et al., *Efficient preparation of ultralarge graphene oxide using a PEDOT: PSS/GO composite layer as hole transport layer in polymer-based optoelectronic devices*. RSC Advances, 2014. **4**(98): p. 55067-55076.
